# Supplementary material for: Melatonin for rapid eye movement sleep behavior disorder in Parkinson's disease: A randomised controlled trial
Source: PubMed Central journal article supplement (PMC7027846; doi:10.1002/mds.27886), 2019-10-31
Supplement: MDS-35-344-s002.pdf [file MDS-35-344-s002.pdf]

## The weekly CIRUS REM sleep behavior disorder questionnaire wCIRUS-RBDQ

Subject ID:

WEEK nr:

### EXPLANATION

***Please complete this questionnaire with your partner, as you may not recall all the events. ANSWER ALL QUESTIONS.***

The questionnaire covers a 7-night period. Please fill in your responses every day and for every event on the following morning, with today's matching date. *If you don't have a partner, any essential and regular observer of your sleep related behavior (other family members, or carer) is considered as a "partner" in this questionnaire.*

This questionnaire will help us assess the severity of your sleep disorder and whether the treatment is working or not.

Your answers to these questions are very important.

### **Explanation of terms used over the pages**

**EVENT**: Any event such as sleep behavior, dream or injuries that occurred in your sleep once per night (1 event/night) or more (2 to 4 events/night)

**"VIVID DREAMS"**: Intense dreams

**"ACTING OUT DREAMS"**: Some patients with REM behavior disorder "act out their dreams" with movements that relate to the content of those dreams, or yelling/talking.. For example, if you are dreaming that you are running away from something, your legs may appear to be running.

**INJURIES**: An injury can include: diving from bed, accidental punches, kicks, bruises, scratches or any damage to the bed environment or any other injuries that required medical intervention

**MEDICATION**: either Circadin (melatonin) or placebo





| LAST NIGHT                                                                                                                                                                                                                  | MONDAY                                                                                                                                                                                                                                                                                                                                                                                                                                                                                                                                                                                                                                                           | TUESDAY                                                                                                                                                                    | WEDNESDAY                                                                                                                                                                  | THURSDAY                                                                                                                                                                   | FRIDAY                                                                                                                                                                     | SATURDAY                                                                                                                                                                   | SUNDAY                                                                                                                                                                     |
|-----------------------------------------------------------------------------------------------------------------------------------------------------------------------------------------------------------------------------|------------------------------------------------------------------------------------------------------------------------------------------------------------------------------------------------------------------------------------------------------------------------------------------------------------------------------------------------------------------------------------------------------------------------------------------------------------------------------------------------------------------------------------------------------------------------------------------------------------------------------------------------------------------|----------------------------------------------------------------------------------------------------------------------------------------------------------------------------|----------------------------------------------------------------------------------------------------------------------------------------------------------------------------|----------------------------------------------------------------------------------------------------------------------------------------------------------------------------|----------------------------------------------------------------------------------------------------------------------------------------------------------------------------|----------------------------------------------------------------------------------------------------------------------------------------------------------------------------|----------------------------------------------------------------------------------------------------------------------------------------------------------------------------|
|                                                                                                                                                                                                                             | __/__/201__                                                                                                                                                                                                                                                                                                                                                                                                                                                                                                                                                                                                                                                      | __/__/201__                                                                                                                                                                | __/__/201__                                                                                                                                                                | __/__/201__                                                                                                                                                                | __/__/201__                                                                                                                                                                | __/__/201__                                                                                                                                                                | __/__/201__                                                                                                                                                                |
| <b>6. INJURY</b><br>- Last night, did you do any of the following mentioned below?<br><br>Rate the severity of every event according to the chart<br><br>(Write score 0 to 10 inside boxes for each of the episodes/dreams) | <p>How severe were those injuries on a scale from 0 to 10?<br/> <b>Rate EVERY event, in the order they occurred?</b><br/>           0 --- 1 --- 2 --- 3 --- 4 --- 5 --- 6 --- 7 --- 8 --- 9 --- 10<br/>           ☺ --- ☹ --- ☹☹</p> <div style="border: 1px solid black; padding: 5px;"> <p>0 = WITHOUT ANY CONSEQUENCE<br/>             5 = SEVERE - Injuries that did not require any help from healthcare professional, minor to mild damage to the bed environment<br/>             10 = VERY SEVERE – Injuries that require medical intervention, major damage to the bed environment<br/>             Indicate <b>99</b> if you don't remember</p> </div> |                                                                                                                                                                            |                                                                                                                                                                            |                                                                                                                                                                            |                                                                                                                                                                            |                                                                                                                                                                            |                                                                                                                                                                            |
| <b>6.1 Injured MYSELF</b><br><b>IF YES, rate the severity</b><br>Dream N°                                                                                                                                                   | YES <input type="checkbox"/> NO <input type="checkbox"/><br>1 2 3 4<br><input type="checkbox"/> <input type="checkbox"/> <input type="checkbox"/> <input type="checkbox"/>                                                                                                                                                                                                                                                                                                                                                                                                                                                                                       | YES <input type="checkbox"/> NO <input type="checkbox"/><br>1 2 3 4<br><input type="checkbox"/> <input type="checkbox"/> <input type="checkbox"/> <input type="checkbox"/> | YES <input type="checkbox"/> NO <input type="checkbox"/><br>1 2 3 4<br><input type="checkbox"/> <input type="checkbox"/> <input type="checkbox"/> <input type="checkbox"/> | YES <input type="checkbox"/> NO <input type="checkbox"/><br>1 2 3 4<br><input type="checkbox"/> <input type="checkbox"/> <input type="checkbox"/> <input type="checkbox"/> | YES <input type="checkbox"/> NO <input type="checkbox"/><br>1 2 3 4<br><input type="checkbox"/> <input type="checkbox"/> <input type="checkbox"/> <input type="checkbox"/> | YES <input type="checkbox"/> NO <input type="checkbox"/><br>1 2 3 4<br><input type="checkbox"/> <input type="checkbox"/> <input type="checkbox"/> <input type="checkbox"/> | YES <input type="checkbox"/> NO <input type="checkbox"/><br>1 2 3 4<br><input type="checkbox"/> <input type="checkbox"/> <input type="checkbox"/> <input type="checkbox"/> |
| <b>6.2 Injured my BED PARTNER?</b><br><b>IF YES, rate the severity</b><br>Dream N°                                                                                                                                          | YES <input type="checkbox"/> NO <input type="checkbox"/><br>1 2 3 4<br><input type="checkbox"/> <input type="checkbox"/> <input type="checkbox"/> <input type="checkbox"/>                                                                                                                                                                                                                                                                                                                                                                                                                                                                                       | YES <input type="checkbox"/> NO <input type="checkbox"/><br>1 2 3 4<br><input type="checkbox"/> <input type="checkbox"/> <input type="checkbox"/> <input type="checkbox"/> | YES <input type="checkbox"/> NO <input type="checkbox"/><br>1 2 3 4<br><input type="checkbox"/> <input type="checkbox"/> <input type="checkbox"/> <input type="checkbox"/> | YES <input type="checkbox"/> NO <input type="checkbox"/><br>1 2 3 4<br><input type="checkbox"/> <input type="checkbox"/> <input type="checkbox"/> <input type="checkbox"/> | YES <input type="checkbox"/> NO <input type="checkbox"/><br>1 2 3 4<br><input type="checkbox"/> <input type="checkbox"/> <input type="checkbox"/> <input type="checkbox"/> | YES <input type="checkbox"/> NO <input type="checkbox"/><br>1 2 3 4<br><input type="checkbox"/> <input type="checkbox"/> <input type="checkbox"/> <input type="checkbox"/> | YES <input type="checkbox"/> NO <input type="checkbox"/><br>1 2 3 4<br><input type="checkbox"/> <input type="checkbox"/> <input type="checkbox"/> <input type="checkbox"/> |
| <b>6.3 FELL out of my bed?</b><br><b>IF YES, rate the severity</b><br>Dream N°                                                                                                                                              | YES <input type="checkbox"/> NO <input type="checkbox"/><br>1 2 3 4<br><input type="checkbox"/> <input type="checkbox"/> <input type="checkbox"/> <input type="checkbox"/>                                                                                                                                                                                                                                                                                                                                                                                                                                                                                       | YES <input type="checkbox"/> NO <input type="checkbox"/><br>1 2 3 4<br><input type="checkbox"/> <input type="checkbox"/> <input type="checkbox"/> <input type="checkbox"/> | YES <input type="checkbox"/> NO <input type="checkbox"/><br>1 2 3 4<br><input type="checkbox"/> <input type="checkbox"/> <input type="checkbox"/> <input type="checkbox"/> | YES <input type="checkbox"/> NO <input type="checkbox"/><br>1 2 3 4<br><input type="checkbox"/> <input type="checkbox"/> <input type="checkbox"/> <input type="checkbox"/> | YES <input type="checkbox"/> NO <input type="checkbox"/><br>1 2 3 4<br><input type="checkbox"/> <input type="checkbox"/> <input type="checkbox"/> <input type="checkbox"/> | YES <input type="checkbox"/> NO <input type="checkbox"/><br>1 2 3 4<br><input type="checkbox"/> <input type="checkbox"/> <input type="checkbox"/> <input type="checkbox"/> | YES <input type="checkbox"/> NO <input type="checkbox"/><br>1 2 3 4<br><input type="checkbox"/> <input type="checkbox"/> <input type="checkbox"/> <input type="checkbox"/> |
| <b>6.4 Damaged the BED ENVIRONMENT?</b><br><b>IF YES, rate the severity</b><br>Dream N°                                                                                                                                     | YES <input type="checkbox"/> NO <input type="checkbox"/><br>1 2 3 4<br><input type="checkbox"/> <input type="checkbox"/> <input type="checkbox"/> <input type="checkbox"/>                                                                                                                                                                                                                                                                                                                                                                                                                                                                                       | YES <input type="checkbox"/> NO <input type="checkbox"/><br>1 2 3 4<br><input type="checkbox"/> <input type="checkbox"/> <input type="checkbox"/> <input type="checkbox"/> | YES <input type="checkbox"/> NO <input type="checkbox"/><br>1 2 3 4<br><input type="checkbox"/> <input type="checkbox"/> <input type="checkbox"/> <input type="checkbox"/> | YES <input type="checkbox"/> NO <input type="checkbox"/><br>1 2 3 4<br><input type="checkbox"/> <input type="checkbox"/> <input type="checkbox"/> <input type="checkbox"/> | YES <input type="checkbox"/> NO <input type="checkbox"/><br>1 2 3 4<br><input type="checkbox"/> <input type="checkbox"/> <input type="checkbox"/> <input type="checkbox"/> | YES <input type="checkbox"/> NO <input type="checkbox"/><br>1 2 3 4<br><input type="checkbox"/> <input type="checkbox"/> <input type="checkbox"/> <input type="checkbox"/> | YES <input type="checkbox"/> NO <input type="checkbox"/><br>1 2 3 4<br><input type="checkbox"/> <input type="checkbox"/> <input type="checkbox"/> <input type="checkbox"/> |

THANK YOU FOR COMPLETING THIS WEEK'S QUESTIONNAIRE!
