# Supplementary material for: Melatonin for rapid eye movement sleep behavior disorder in Parkinson's disease: A randomised controlled trial
Source: PubMed Central journal article supplement (PMC7027846; doi:10.1002/mds.27886), 2019-10-31
Supplement: MDS-35-344-s004.pdf [file MDS-35-344-s004.pdf]

## Supplementary Table 1: Inclusion and Exclusion criteria

### Inclusion criteria

1. Age over 18 years;
2. Mini Mental State Examination (MMSE)  $\geq 24$ ;
3. REM sleep behavior disorder (RBD) as defined by the International Classification for Sleep Disorder criteria (ICSD-2);
4. RBD Screening questionnaire criteria (RBDSQ) with a score equal to or greater than 5/13;
5. Two or more events of RBD defined by dream enactment behavior and/or sleep-related injuries (items 2 and 4 of the wCIRUS-RBDQ) during the 4 weeks (screening period) prior to randomisation;
6. Stable medications for 1 month prior to randomisation.

### Exclusion criteria

1. Untreated obstructive sleep apnea with an Apnea Hypopnea Index (AHI)  $>20$ ;
2. Significant psychiatric disorder or cognitive impairment (MMSE  $< 24$ );
3. Any significant liver, kidney or autoimmune disease;
4. Current use of benzodiazepines or other non-benzodiazepine hypnotics (e.g. zaleplon, zolpidem, zopiclone), native compounds of melatonin, other melatonergic agonists, unless washout of more than four weeks;
5. Drug-induced RBD (anti-depressants) with clear relation between RBD onset and medication;
6. Excessive alcohol consumption ( $>25$  Unit/week);
7. Pregnancy or lactation;
8. Use of light therapy (for treatment of sleep-wake disorders) within the last 6 months;
9. Galactose intolerance, LAPP lactase deficiency or glucose-galactose malabsorption.

**Supplementary Table 2: List of secondary outcome measures**

| <b>Secondary outcomes</b>                                                                                                                  | <b>Time point</b>                                                                                                               |
|--------------------------------------------------------------------------------------------------------------------------------------------|---------------------------------------------------------------------------------------------------------------------------------|
| 1. Mean of the total number of nights per week in which an RBD incident was reported on item 4 of the wCIRUS-RBDQ                          | Aggregate of nights per week, averaged over weeks 5 to 8 of treatment.                                                          |
| 2. Mean of the total number of vivid dreams as reported on item 5 of the wCIRUS-RBDQ                                                       | Aggregate of events per week, averaged over weeks 5 to 8 of treatment.                                                          |
| 3. Mean of the total number and severity of injuries and bedroom environment damage incidents as reported on item 6 of the wCIRUS-RBDQ     | Aggregate of events per week, averaged over weeks 5 to 8 of treatment.                                                          |
| 4. REM sleep without atonia index (RSWAI) during video-PSG, as per the method of Ferri et al. (2008).                                      | Improvement in the second PSG at the end of treatment compared to the first PSG at screening.                                   |
| 5. Objective sleep measures as recorded with PSG                                                                                           | Improvement in the second PSG at the end of treatment compared to the first PSG during screening.                               |
| 6. Objective activity measures during sleep as recorded with actigraphy                                                                    | Improvement in the second week of actigraphy at the end of treatment compared to the first week of actigraphy during screening. |
| 5. Clinical Global Improvement (CGI) impression scale                                                                                      | At the end of treatment (V.4).                                                                                                  |
| 6. Total scores on the RBDSQ, RBD-I, RBD-HK, LSEQ, ESS, PSQI, DASS, PDQ39, and the 8 health related sub-items of the SF-36 questionnaires. | Improvement at the end of treatment (V.4) compared to baseline prior to randomisation (V.2).                                    |
| 7. Parkinson's disease symptom severity as measured with the UPDRS total score and the UPDRS motor symptoms (section 3) sub-score.         | Improvement at the end of treatment (V.4) compared to baseline prior to randomisation (V.2).                                    |

**Abbreviations:** RBD=REM sleep Behaviour Disorder; wCIRUS-RBDQ=weekly CIRUS RBD Questionnaire; PSG=Polysomnography; RBDSQ=RBD Screening Questionnaire; RBD-I: Innsbruck RBD Inventory; RBD-HK: RBD Questionnaire Hong Kong; LSEQ: Leeds Sleep Evaluation Questionnaire; ESS: Epworth Sleepiness Scale; PSQI=Pittsburgh Sleep Quality Index; DASS=Depression and Anxiety Stress Scale; PDQ-39=39-item Parkinson's Disease Questionnaire; SF-36=36-item Short Form Survey; V.4=Visit 4 (End treatment); V.2=Visit 2 (Baseline).

**Supplementary Table 3: Baseline characteristics of both groups at time of randomisation**

|                                                    | Melatonin<br>(n=15) | Placebo<br>(n=15) |
|----------------------------------------------------|---------------------|-------------------|
| Age (years)                                        | 65.3 (6.9)          | 67.9 (5.3)        |
| Sex (M/F)                                          | 12/3                | 13/2              |
| MMSE                                               | 29.3 (1.0)          | 29.1 (1.2)        |
| Disease duration (years)                           | 5.07 (3.9)          | 6.13 (4.4)        |
| UPDRS-total                                        | 50.8 (28)           | 55.0 (31)         |
| UPDRS-I                                            | 11.1 (5.0)          | 11.9 (6.9)        |
| UPDRS-II                                           | 11.0 (6.9)          | 10.3 (7.2)        |
| UPDRS-III                                          | 27.3 (19)           | 29.9 (16)         |
| UPDRS-IV                                           | 1.40 (1.6)          | 2.80 (4.1)        |
| Hoehn and Yahr stage <sup>#</sup>                  | 2 (0*-2.5)          | 2 (1-2.5)         |
| LEDD                                               | 640.1 (310)         | 621.6 (376)       |
| Number of Participants on:<br>Levodopa monotherapy | 2                   | 5                 |
| Dopamine agonist<br>monotherapy                    | 0                   | 1                 |
| Levodopa + dopamine<br>agonist                     | 2                   | 1                 |
| Levodopa + MAO-inhibitor                           | 3                   | 5                 |
| MAO-inhibitor monotherapy                          | 1                   | 0                 |
| Levodopa + dopamine<br>agonist + MAO-inhibitor     | 5                   | 2                 |
| Levodopa + MAO-inhibitor +<br>COMT-inhibitor       | 0                   | 1                 |
| Dopamine agonist + MAO-<br>inhibitor               | 1                   | 0                 |
| Untreated                                          | 1*                  | 0                 |

NOTE: Mean (SD) presented unless otherwise stated. Abbreviations: MMSE = Mini Mental State Examination; UPDRS=Movement Disorder Society Unified Parkinson's Disease Rating Scale; LEDD=Levodopa Equivalent Daily Dose. <sup>#</sup>Median (range), \*Subject with clinically isolated RBD that was diagnosed with PD approximately three months after concluding the study.
